# Supplementary material for: 52. 医療用具の電子線滅菌 II : ディスポーザブル注射針のバイオバーデンと滅菌線量
Source: Royal Society of Chemistry journal article supplement (doi:10.1039/d2an00560c), 1992-12-10
Supplement: d2an00560c1.pdf [file d2an00560c1.pdf]

## **Supporting information**

### **Mimetic peroxidase based on gold amalgam for colorimetric sensing of trace mercury (II) in water samples**

Jing Jiang, Xianwen Kan\*

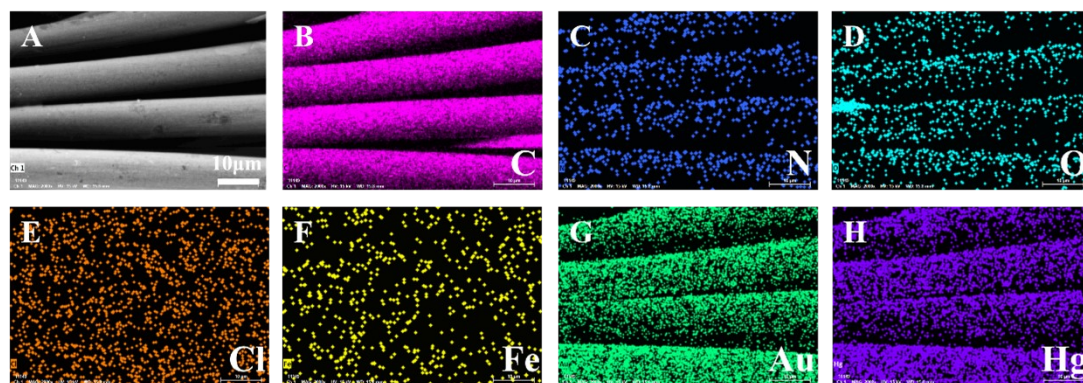

**Fig. S1** Elemental mapping of Au-Hg/HrGO/CC (A-H).

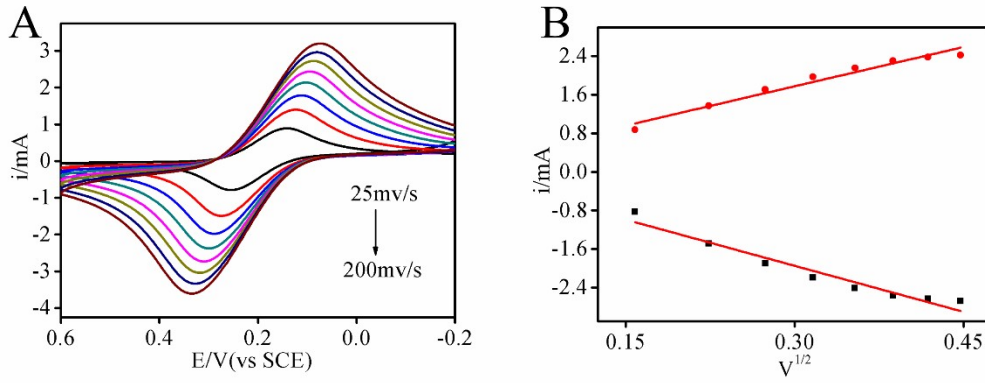

**Fig. S2** CV response of AuNPs/H-rGO/CC under varied scan rates from 25 mV/s to 200 mV/s in 5.0 mM  $K_3[Fe(CN)_6]$  solution. Linear fitting curve between the peak current and half power of scan rate corresponding with AuNPs/H-rGO/CC (B).

The active area of AuNPs/H-rGO/CC was measured electrochemically because conductive material CC can be used as a working electrode. The working electrode was chosen as AuNPs/H-rGO/CC with a geometric area of  $0.5 \text{ cm} \times 0.6 \text{ cm}$ , the reference electrode was a saturated calomel electrode (SCE), and the auxiliary electrode was a platinum electrode, respectively. CV curves were recorded on a Shanghai Chenhua CHI660C electrochemical workstation using 5.0 mM  $Fe(CN)_6^{3-/4-}$  as the electrochemical probe at different scan rates (Fig. S2). The active area of AuNPs/H-rGO/CC was calculated using the Randles-Sevcik equation (equation (1)) [1,2].

$$i_p = (2.69 \times 10^5) n^{3/2} A D_0^{1/2} c v^{1/2} \quad (1)$$

where  $i_p$  is the peak current intensity,  $n$  is the number of electrons transferred in the reaction ( $n = 1$ ), and  $D_0$  is the diffusion coefficient ( $D_0$  is the ferricyanide  $6.67 \times 10^{-6} \text{ cm}^2/\text{s}$ ),  $A$  is the effective area of the electrode ( $\text{cm}^2$ ),  $c$  is the  $Fe(CN)_6^{3-/4-}$  probe concentration ( $\text{mol}/\text{cm}^3$ ), and  $v$  is the scan rate ( $\text{v}/\text{s}$ ). The effective area of AuNPs/H-

rGO/CC was calculated to be  $1.84 \text{ cm}^2$  according to equation (1), which was approximately 6 times the geometric area. It's obvious that the high surface area of CC was beneficial to the loading of the AuNPs and H-rGO, which further facilitated to the formation of gold amalgam and the colorimetric detection of mercury ions.

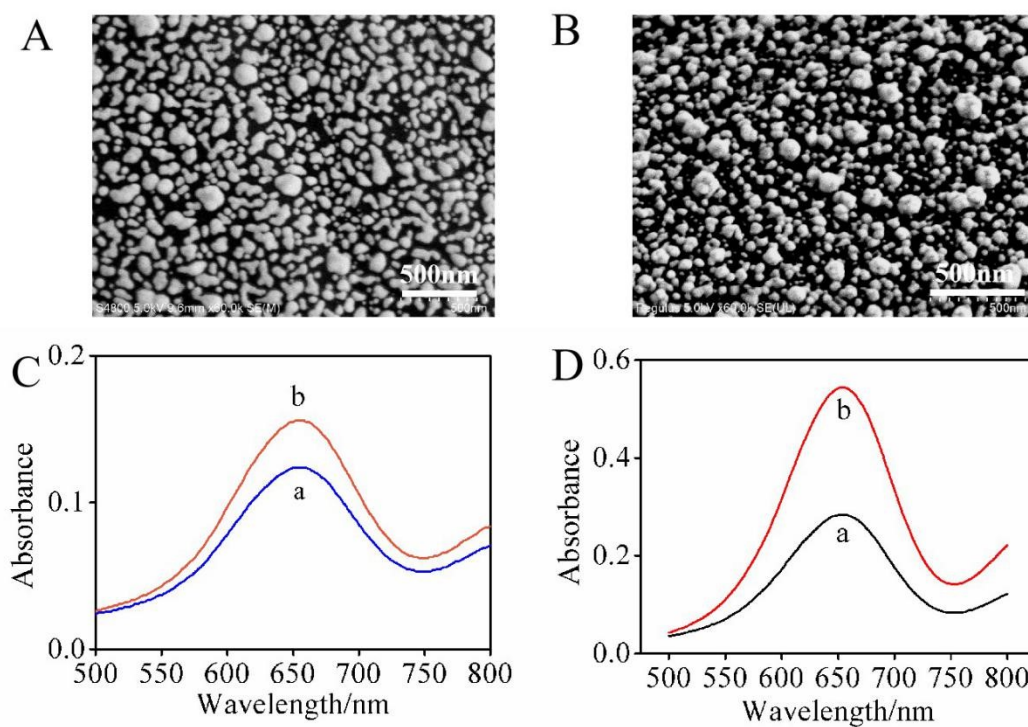

**Fig. S3** SEM images of (A) AuNPs/CC at 5 polymerization turns, (B) AuNPs/H-rGO/CC at 9 polymerization circles. (C) UV spectra of AuNPs/CC before the addition of mercury (a) and after the addition of mercury (b) when the number of polymerization circles was 5. (D) UV spectra of AuNPs/H-rGO/CC before the addition of mercury (a) and after the addition of mercury (b) when the number of polymerization circles was 5.



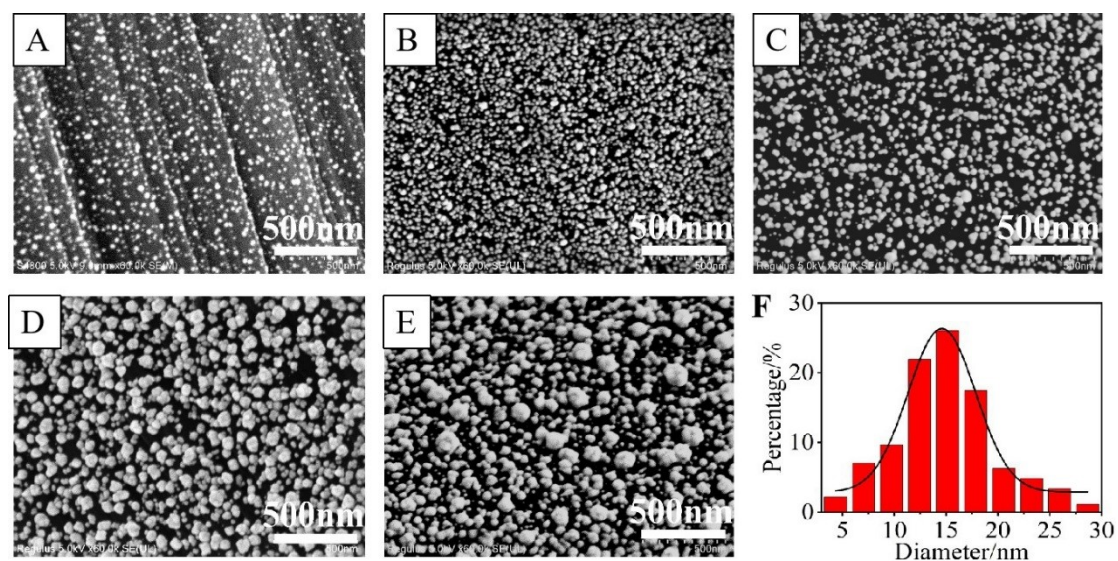

**Fig. S4** SEM images of AuNPs/H-rGO/CC for Au polymerization of 1 (A), 3 (B), 5 (C), 7 (D), and 9 (E) circles, and (F) particle size distribution of AuNPs/H-rGO/CC at the optimal number of polymerization circle number.

**Table S1** The comparison of the performances of different reported sensors for the determination of  $\text{Hg}^{2+}$ .

| Method                   | Linear range (mol/L)                         | LOD (mol/L)           | Ref.      |
|--------------------------|----------------------------------------------|-----------------------|-----------|
| Colorimetric             | $8.0 \times 10^{-8}$ - $1.4 \times 10^{-4}$  | $1.2 \times 10^{-9}$  | [3]       |
| Colorimetric             | $1.0 \times 10^{-9}$ - $4 \times 10^{-7}$    | $3.3 \times 10^{-10}$ | [4]       |
| Colorimetric             | $2.5 \times 10^{-7}$ - $8 \times 10^{-6}$    | $1.6 \times 10^{-9}$  | [5]       |
| Colorimetric             | $1.0 \times 10^{-6}$ - $5.0 \times 10^{-6}$  | $1.0 \times 10^{-7}$  | [6]       |
| Fluorescence             | 0- $6.0 \times 10^{-5}$                      | $2.6 \times 10^{-8}$  | [7]       |
| Fluorescence             | 0 - $3.5 \times 10^{-7}$                     | $1.5 \times 10^{-8}$  | [8]       |
| Fluorescence             | $1.0 \times 10^{-8}$ - $1.5 \times 10^{-6}$  | $9.2 \times 10^{-9}$  | [9]       |
| Electrochemistry         | $3.3 \times 10^{-7}$ - $3.3 \times 10^{-6}$  | $2.0 \times 10^{-10}$ | [10]      |
| Chemiluminescence        | $1.0 \times 10^{-7}$ - $2.5 \times 10^{-5}$  | $1.0 \times 10^{-8}$  | [11]      |
| Electrochemiluminescence | $1.0 \times 10^{-8}$ - $5 \times 10^{-6}$    | $5 \times 10^{-9}$    | [12]      |
| Colorimetric             | $3.2 \times 10^{-10}$ - $1.0 \times 10^{-6}$ | $3.8 \times 10^{-10}$ | this work |

**Table S2** Determination of  $\text{Hg}^{2+}$  in different water samples.

| Samples                 | Added (mol/L)        | Found (mol/L)          | Recovery (%) | RSD (%) |
|-------------------------|----------------------|------------------------|--------------|---------|
| Tap water               | $1.0 \times 10^{-7}$ | $9.83 \times 10^{-8}$  | 98.25        | 2.21    |
|                         | $1.0 \times 10^{-9}$ | $1.0 \times 10^{-9}$   | 100.11       | 4.34    |
| mineral water           | $1.0 \times 10^{-7}$ | $1.01 \times 10^{-7}$  | 100.78       | 1.90    |
|                         | $1.0 \times 10^{-9}$ | $1.03 \times 10^{-9}$  | 102.67       | 3.81    |
| Lake water              | $1.0 \times 10^{-7}$ | $1.0 \times 10^{-7}$   | 100.13       | 1.10    |
|                         | $1.0 \times 10^{-9}$ | $9.82 \times 10^{-10}$ | 97.04        | 1.10    |
| River water             | $1.0 \times 10^{-7}$ | $1.01 \times 10^{-7}$  | 101.42       | 2.18    |
|                         | $1.0 \times 10^{-9}$ | $1.01 \times 10^{-9}$  | 101.33       | 1.10    |
| Industrial wastewater 1 | $1.0 \times 10^{-7}$ | $9.70 \times 10^{-8}$  | 103.03       | 3.32    |
|                         | $1.0 \times 10^{-9}$ | $1.03 \times 10^{-9}$  | 102.66       | 3.26    |
| Industrial wastewater 2 | $1.0 \times 10^{-7}$ | $1.0 \times 10^{-7}$   | 100.16       | 2.89    |
|                         | $1.0 \times 10^{-9}$ | $1.0 \times 10^{-9}$   | 100.07       | 2.21    |

## Reference

- [1] T. R. L. C. Paixão, Measuring Electrochemical Surface Area of Nanomaterials versus the Randles–Ševčík Equation, *ChemElectroChem*, 2020, 7, 3414-3415.
- [2] Z. Abdi, M. Vandichel, A. S. Sologubenko, M.-G. Willinger, J.-R. Shen, S. I. Allakhverdiev and M. M. Najafpour, *Int. J. Hydrogen Energ.*, 2021, 46, 37774-37781.
- [3] L. Xing, Q. Zhao, X. Zheng, M. Hui, Y. Peng, X. Zhu, L. Hu, W. Yao and Z. Yan, *ACS Appl. Nano. Mater.*, 2021, 4, 3639-3646. DOI: 10.1021/acsanm.1c00157.
- [4] W.-R. Cui, C.-R. Zhang, W. Jiang, R.-P. Liang, S.-H. Wen, D. Peng and J.-D. Qiu, *ACS Sustain. Chem. Eng.*, 2019, 7, 9408-9415. DOI: 10.1021/acssuschemeng.9b00613.
- [5] P. Ju, Z. Wang, Y. Zhang, X. Zhai, F. Jiang, C. Sun and X. Han, *Colloid Surface A*, 2020, 603, 125203. DOI: 10.1016/j.colsurfa.2020.125203.
- [6] Y. Zhang, J. Song, Q. Pan, X. Zhang, W. Shao, X. Zhang, C. Quan and J. Li, *J. Mater. Chem. B*, 2020, 8, 114-124. DOI: 10.1039/c9tb02183c.
- [7] S. Yu, W. Li, Y. Fujii, T. Omura and H. Minami, *ACS Sustain. Chem. Eng.*, 2019, 7, 19157-19166. DOI: 10.1021/acssuschemeng.9b05142.
- [8] S. Subedi, L. N. Neupane, H. Yu and K.-H. Lee, *Sensor. Actuat. B-Chem.*, 2021, 338, 129814. DOI: 10.1016/j.snb.2021.129814.
- [9] Y. Zhang, S. Guo, Z. Jiang, G. Mao, X. Ji and Z. He, *Anal. Chem.*, 2018, 90, 9796-9804. DOI: 10.1021/acs.analchem.8b01574.
- [10] X. Pang, H. Bai, H. Zhao, Y. Liu, F. Qin, X. Han, W. Fan and W. Shi, *ACS Appl. Mater. Inter*, 2021, 13, 46980-46989. DOI: 10.1021/acsami.1c10260.



- [11] M. Saqib, S. Bashir, H. Li, C. Li, S. Wang and Y. Jin, *Anal. Chem.*, 2019, 91, 12517-12524. DOI: 10.1021/acs.analchem.9b03314.
- [12] Q. Zhai, H. Xing, X. Zhang, J. Li and E. Wang, *Anal. Chem.*, 2017, 89, 7788-7794. DOI:10.1021/acs.analchem.7b01897.
